# Supplementary material for: Identification of potential chemosignals in the European water vole Arvicola terrestris
Source: PubMed Central journal article supplement (PMC6895148; doi:10.1038/s41598-019-54935-z), 2019-12-05

# Identification of potential chemical signals in the European water vole *Arvicola terrestris*

Patricia Nagnan-Le Meillour, Amandine Descamps, Chrystelle Le Danvic, Maurane Grandmougin, Jean-Michel Saliou, Christophe Klopp, Marine Milhes, Coralie Bompard, Didier Chesneau, Kevin Poissenot, Matthieu Keller

## Supplementary information 1: supplementary figures and tables (presented in order of appearance in the text)

**Supplementary Table S1.** Identified and partially identified (*italics*) compounds in *A. terrestris* male and female (N=68) lateral scent glands by GC/MS

**Supplementary Table S2.** Identified and partially identified (*italics*) compounds in *A. terrestris* male and female urine (N= 33) by SPME-GC/MS

**Supplementary Table S3.** Animals caught in the field used for identification of urinary volatiles and proteins, and RNA sequencing

**Supplementary Table S4.** Peptides identified in bands from 1D-E gels of males and females *A. terrestris* (pattern in Figure 4), which are homologous to peptides of *M. glareolus* OBPs

**Supplementary Figure S1.** MS/MS spectrum of the WVTVALAADNVNK peptide

**Supplementary Figure S2.** MS/MS spectrum of the GQPLTPEQYEEKLEEFK peptide

**Supplementary Table S5.** Primers used for amplification of the sequence encoding glareosin-like (arvicolin) from *A. terrestris* male liver

**Supplementary Table S6.** Sequences from Blastp search with arvicolin protein sequence as query and used for the building of the phylogenetic tree (Fig. 6)

**Supplementary Figure S3.** Sequences used in Megablast search

**Supplementary Figure S4.** Number of arvicolin reads counted in the liver transcriptome of *A. terrestris* males and females

**Supplementary Figure S5.** Two-dimensional electrophoresis of male 6 (October) extract of urinary proteins

**Supplementary Figure S6.** MSMS spectra of identified phosphopeptides from arvicolin.

**Supplementary Table S1.** Identified and partially identified (*italics*) compounds in *A. terrestris* male and female (N=68) lateral scent glands by GC/MS (NIST = NIST library; Std = commercial compound) - \* refers to compounds not present in the chromatogram of **Fig. 1** (Male 18 – October), but identified in other animals.

| Name  | Rt (min) | Compound                               | Identification           | Name   | Rt (min) | Compound                                            | Identification       | Name   | Rt (min) | Compound                           | Identification |
|-------|----------|----------------------------------------|--------------------------|--------|----------|-----------------------------------------------------|----------------------|--------|----------|------------------------------------|----------------|
| ATG1  | 03.75    | 3-ethyl, hexane                        | NIST + Std               | ATG18  | 25.16    | 1-heptadecanol                                      | NIST                 | ATG35  | 36.47    | <i>Xdecyl ester, hexanoic acid</i> | Fragmentation  |
| ATG2  | 05.96    | 3-methyl, butanoic acid                | NIST                     | ATG19  | 27.72    | <i>1-octadecanol</i>                                | <i>NIST</i>          | ATG36  | 36.55    | nonadecyl ester, octanoic acid     |                |
| ATG3  | 06.18    | 2-methyl, butanoic acid                | NIST + Std               | ATG20  | 30.52    | pentadecyl ester, octanoic acid                     | Fragmentation        | ATG37  | 37.06    | nonadecyl ester, octanoic acid     | Fragmentation  |
| ATG4  | 08.23    | 6-methyl, 2-heptanone                  | NIST                     | ATG21* | 31.45    | <i>Xdecyl ester (?), nonanoic acid</i>              | Fragmentation        | ATG38  | 37.38    | nonadecyl ester, nonanoic acid     | Fragmentation  |
| ATG5  | 08.46    | benzaldehyde                           | NIST + Std               | ATG22  | 31.50    | <i>3-methyl-, hexadecyl ester(?), butanoic acid</i> | <i>Fragmentation</i> | ATG39  | 37.92    | decadecyl ester, octanoic acid,    | Fragmentation  |
| ATG6  | 08.81    | <i>4-methyl-5,6-dihydropyran-2-one</i> | <i>See ATG8 spectrum</i> | ATG23  | 32.67    | hexadecyl ester, octanoic acid                      | Fragmentation        | ATG40  | 38.40    | octadecyl ester, decanoic acid,    | Fragmentation  |
| ATG7  | 09.42    | 2-methyl-3-methylene, nonane           | NIST                     | ATG24  | 32.75    | unidentified compound 3                             |                      | ATG41* | 38.75    | decadecyl ester, nonanoic acid     | Fragmentation  |
| ATG8  | 10.06    | 5,6-dihydro-2H-Pyran-2-one             | NIST                     | ATG25* | 33.01    | hexadecyl ester, pentanoic acid                     | Fragmentation        | ATG42  | 39.24    | nonadecyl ester, decanoic acid     | Fragmentation  |
| ATG9  | 11.40    | nonanal                                | NIST + Std               | ATG26  | 33.60    | heptadecyl ester, octanoic acid,                    | Fragmentation        | ATG43  | 40.52    | (-)-Cholesterol                    | NIST           |
| ATG10 | 12.72    | 2-isoamylpyrazine                      | NIST                     | ATG27* | 34.14    | unidentified compound 4                             |                      | ATG44  | 40.68    | unidentified compound 5            |                |
| ATG11 | 13.90    | 2-isoamyl-6-methylpyrazine             | NIST                     | ATG28* | 34.16    | <i>1-heneicosyl formate with 2 double bonds</i>     | NIST                 | ATG45  | 41.07    | decadecyl ester, decanoic acid     | Fragmentation  |
| ATG12 | 14.07    | 2-Decenal, (Z)-                        | NIST + Std               | ATG29  | 34.53    | heptadecyl ester, pentanoic acid                    | NIST                 | ATG46  | 41.87    | undecadecyl ester, decanoic acid   | Fragmentation  |
| ATG13 | 15.58    | undecenal                              | NIST + Std               | ATG30* | 35.06    | octadecyl ester, octanoic acid                      | Fragmentation        | ATG47* | 43.02    | unidentified compound 6            |                |
| ATG14 | 16.41    | caryophyllene                          | NIST + Std               | ATG31  | 35.26    | <i>Octadecenol (?)</i>                              | Fragmentation        | ATG48  | 43.05    | unidentified compound 7            |                |

|       |       |                         |              |        |       |                                                   |               |       |       |                         |  |
|-------|-------|-------------------------|--------------|--------|-------|---------------------------------------------------|---------------|-------|-------|-------------------------|--|
| ATG15 | 19.74 | codecalactone           | NIST library | ATG32* | 35.51 | hexadecyl ester, decanoic acid                    | Fragmentation | ATG49 | 43.72 | unidentified compound 8 |  |
| ATG16 | 23.72 | unidentified compound 1 |              | ATG33  | 35.61 | octadecyl ester, octanoic acid (isomer of ATG30?) | Fragmentation | ATG50 | 44.05 | unidentified compound 9 |  |
| ATG17 | 24.65 | unidentified compound 2 |              | ATG34  | 36.13 | heptadecenyl ester, nonanoic acid                 | Fragmentation |       |       |                         |  |

**Supplementary Table S2.** Identified and partially identified (*italics*) compounds in *A. terrestris* male and female urine (N= 33) by SPME-GC/MS (NIST = NIST library; Std = commercial compound) - \* refers to compounds not present in the chromatogram of **Fig. 3** (Male 1 – May), but identified in other animals

| Name   | Rt (min) | Compound                                         | Identification | Name   | Rt (min) | Compound                                                       | Identification |
|--------|----------|--------------------------------------------------|----------------|--------|----------|----------------------------------------------------------------|----------------|
| ATU1*  | 01.95    | 1-penten-3-one                                   | NIST + Std     | ATU16* | 14.29    | 4-methylphenol (p-Cresol)                                      | NIST           |
| ATU2*  | 02.04    | 3-pentanone                                      | NIST           | ATU17* | 14.54    | <i>6-Propenyl bicyclo[3.1.0] hexan-2-one</i>                   | NIST           |
| ATU3*  | 02.10    | heptane                                          | NIST + Std     | ATU18  | 14.67    | 2-methyl-6-(1-propenyl)-, (Z)- pyrazine                        | NIST           |
| ATU4*  | 02.53    | 3-penten-2-one                                   | NIST + Std     | ATU19  | 15.30    | nitrile benzyl                                                 | NIST + Std     |
| ATU5   | 06.24    | 2,3-dimethyl, bicyclo[2.2.1]hept-2-ene (santene) | NIST           | ATU20* | 16.05    | <i>2,6,6-Trimethyl-2-cyclohexene-1,4-dione</i>                 | NIST           |
| ATU6*  | 06.69    | styrene                                          | NIST + Std     | ATU21* | 17.88    | octanoic acid                                                  | NIST + Std     |
| ATU7   | 07.27    | 1-nitro-3-methylbutane                           | NIST           | ATU22  | 21.12    | <i>di(2-phenylethyl) ester, oxalic acid</i>                    | NIST           |
| ATU8   | 07.81    | 2,5-dimethyl-pyrazine                            | NIST + Std     | ATU23  | 24.15    | 2-nitroethenyl, benzene (beta-nitro-styrene)                   | NIST           |
| ATU9*  | 08.23    | dimethyl sulfone                                 | NIST + Std     | ATU24* | 24.55    | Unidentified compound 2                                        |                |
| ATU10  | 09.61    | benzaldehyde                                     | NIST + Std     | ATU25* | 24.96    | 2H-1-benzopyran-2-one (Coumarin)                               |                |
| ATU11  | 11.15    | trimethyl pyrazine                               | NIST + Std     | ATU26  | 25.96    | 1-(1,5-dimethyl-4-hexenyl)-4-methyl, benzene (Alpha-curcumene) | NIST           |
| ATU12* | 11.54    | Unidentified compound 1                          |                | ATU27  | 27.95    | Unidentified compound 3                                        |                |
| ATU13* | 12.30    | 2-hydroxy benzaldehyde                           | NIST           | ATU28* | 27.56    | Unidentified compound 4                                        |                |
| ATU14* | 12.53    | acetaldehyde benzene                             | NIST + Std     | ATU29  | 30.48    | <i>1,1'-oxybis, octane</i>                                     | NIST           |
| ATU15  | 13.87    | 3-ethyl-2,5-dimethyl, pyrazine                   | NIST           |        |          |                                                                |                |

**Supplementary Table S3.** Animals caught in the field used for identification of urinary volatiles and proteins, and RNA sequencing

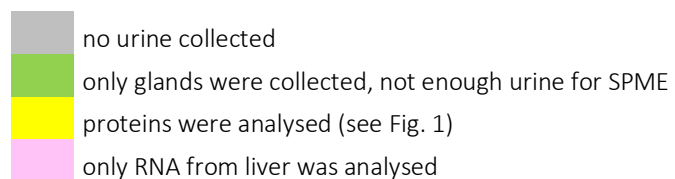

| 2016 October |     | Marcenat   |       |     |                    |                    |          |           |     |              |  |
|--------------|-----|------------|-------|-----|--------------------|--------------------|----------|-----------|-----|--------------|--|
| Animal #     | Sex | Weight (g) | Urine | LSG | Testis weight (mg) | Uterus weight (mg) | Proteins | Volatiles | RNA | Vaginal swab |  |
| 1            | M   | 79.7       | X     |     | 356.6              |                    |          | no signal |     |              |  |
| 3            | M   | 55         | X     | X   | 106.1              |                    |          | X         |     |              |  |
| 5            | F   | 61.1       | X     |     |                    |                    |          | no signal |     |              |  |
| 6            | M   | 94.7       | X     | X   | 203.2              |                    |          | X         |     |              |  |
| 7            | F   | 63.7       | X     | X   |                    | 102.3              |          |           |     |              |  |
| 8            | F   | 62.8       |       | X   |                    | 7.4                |          |           |     |              |  |
| 9            | F   | 74.3       | X     | X   |                    | 49.9               |          | no signal |     |              |  |
| 10           | M   | 71         |       | X   | 248.9              |                    |          | no signal |     |              |  |
| 11           | F   | 108.7      |       | X   |                    | 172                |          |           |     |              |  |
| 12           | M   | 44.5       | X     | X   | 50.3               |                    |          |           |     |              |  |
| 13           | F   | 75.4       |       | X   |                    | 36.2               |          |           |     |              |  |
| 15           | F   | 96.4       | X     | X   |                    | 72.4               |          | no signal |     |              |  |
| 16           | M   | 88.3       |       | X   | 225.9              |                    |          |           |     |              |  |
| 17           | F   | 84.1       |       | X   |                    | 164.1              |          |           |     |              |  |
| 18           | M   | 65.2       | X     | X   | 332.1              |                    |          | X         |     |              |  |
| 19           | F   | 78.2       |       | X   |                    | 121.5              |          |           |     |              |  |
| 20           | M   | 70.5       | X     |     | 145.4              |                    |          | no signal |     |              |  |

|    |   |      |                                                                                   |   |  |       |                                                                                     |   |
|----|---|------|-----------------------------------------------------------------------------------|---|--|-------|-------------------------------------------------------------------------------------|---|
| 21 | F | 83.5 |  | X |  | 129.6 |                                                                                     |   |
| 22 | F | 65.9 |                                                                                   | X |  | 91.7  |  | X |
| 23 | F | 97.6 |  | X |  | 264.8 |                                                                                     |   |

Start of pregnancy

2017 May Laqueuille

|    |   |       |                                                                                    |   |       |       |                                                                                       |   |           |
|----|---|-------|------------------------------------------------------------------------------------|---|-------|-------|---------------------------------------------------------------------------------------|---|-----------|
| 1  | M | 141   |                                                                                    | X | 494.9 |       |    | X |           |
| 2  | F | 116   |   | X |       | 223.5 |                                                                                       |   | diestrus  |
| 3  | F | 122   |   | X |       |       |                                                                                       |   | pregnant  |
| 4  | F | 94    |                                                                                    | X |       | 220.5 |                                                                                       | X | estrus    |
| 5  | M | 56.1  |   | X | 136.1 |       |                                                                                       |   |           |
| 6  | F | 122   |                                                                                    | X |       | 258.9 |    | X |           |
| 7  | F | 38.3  |                                                                                    | X |       | 26.7  |                                                                                       |   |           |
| 8  | M | 121   |                                                                                    | X | 556.1 |       |    | X |           |
| 9  | F | 122.4 |   | X |       | 212.1 |                                                                                       |   | metestrus |
| 10 | F | 127   |                                                                                    | X |       | 185.8 |    | X | metestrus |
| 11 | F | 58    |   | X |       | 96.3  |                                                                                       |   | estrus    |
| 12 | F | 43.7  |   | X |       | 31.9  |                                                                                       |   |           |
| 13 | F | 89.9  |                                                                                    | X |       | 244   |    | X | estrus    |
| 14 | M | 87    |                                                                                    | X | 523   |       |                                                                                       |   |           |
| 15 | M | 64    |                                                                                    | X | 173.4 |       |                                                                                       | X |           |
| 17 | F | 40    |   | X |       | 38.5  |                                                                                       |   |           |
| 18 | M |       |                                                                                    | X | 400.2 |       |                                                                                       |   |           |
| 19 | F | 114   |   | X |       |       |                                                                                       |   | pregnant  |
| 20 | F | 53.5  |  | X |       | 89.7  |                                                                                       |   | estrus    |
| 21 | F | 114   |                                                                                    | X |       |       |  | X | pregnant  |
| 22 | F | 122   |                                                                                    | X |       | 147.8 |                                                                                       | X | metestrus |
| 23 | M | 131.6 |                                                                                    | X | 498.7 |       |  | X |           |
| 24 | M | 119   |                                                                                    | X | 612.1 |       |  | X |           |

|    |   |      |   |   |       |       |   |        |
|----|---|------|---|---|-------|-------|---|--------|
| 25 | M | 69.9 | X | X | 181.1 |       | X |        |
| 26 | M | 126  |   | X | 589.1 |       |   |        |
| 28 | F | 106  | X | X |       | 303.6 | X | estrus |

2017 July

Laqueuille

|    |   |       |   |   |       |       |           |           |
|----|---|-------|---|---|-------|-------|-----------|-----------|
| 2  | F | 44.8  | X | X |       | 59    | X         |           |
| 3  | F | 77.9  |   | X |       | 61.5  |           | diestrus  |
| 4  | M | 41.8  | X | X | 62.3  |       | no signal |           |
| 5  | F | 90.6  | X | X |       | 186.1 | X         | diestrus  |
| 6  | M | 25.9  | X | X | 41.1  |       |           |           |
| 7  | F | 24.6  |   | X |       | 12    |           |           |
| 8  | M | 27.8  | X | X | 57    |       | X         |           |
| 9  | F | 60.2  |   | X |       | 98.4  |           | metestrus |
| 10 | F | 24.3  | X | X |       | 11.5  |           |           |
| 11 | M | 65.2  |   | X | 344   |       |           |           |
| 12 | F | 89.6  | X | X |       | 164   | X         | metestrus |
| 13 | F | 96    |   | X |       |       |           | pregnant  |
| 14 | M | 25.2  | X | X | 38    |       | X         |           |
| 15 | F | 97.4  | X | X |       | 173.2 | X         | diestrus  |
| 16 | F | 108.5 |   | X |       |       |           | pregnant  |
| 17 | F | 92.9  | X | X |       |       | X         | pregnant  |
| 18 | M | 138.9 | X | X | 442.7 |       | X         |           |
| 19 | F | 142   |   | X |       |       |           | pregnant  |
| 20 | F | 85    |   | X |       | 92    |           |           |
| 21 | F | 90.3  |   | X |       | 295.4 |           | diestrus  |
| 22 | M | 61.4  |   | X | 230   |       |           |           |
| 23 | F | 55.7  |   | X |       | 49.2  |           | diestrus  |
| 24 | F | 76.6  |   | X |       |       |           | pregnant  |

|    |   |       |   |   |     |
|----|---|-------|---|---|-----|
| 25 | M | 114.2 | X | X | 520 |
| 26 | F | 104.8 |   | X |     |

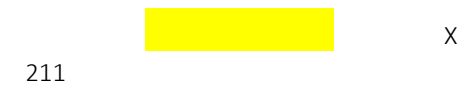

diestrus

2018 April Saint-Julien-Puy-Lavèze

|   |   |     |  |  |       |
|---|---|-----|--|--|-------|
| 1 | M | 73  |  |  | 323.1 |
| 2 | F | 130 |  |  | 493.4 |
| 3 | M | 132 |  |  | 392.1 |
| 4 | M | 122 |  |  |       |
| 7 | F | 108 |  |  |       |
| 8 | F | 84  |  |  |       |

304.6  
144.4

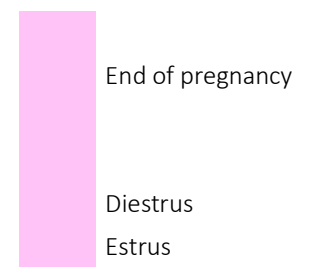

**Supplementary Table S4.** Peptides identified in bands from 1D-E gels of males and females *A. terrestris* (pattern in Figure 4), which are homologous to peptides of *M. glareolus* OBPs. Band # is indicated in Fig.4. Peptides are replaced (in red) on the *M. glareolus* sequences below.

| Protein name | Protein accession number                                          | Calculated molecular mass | Band #        | Peptide (s)                                     | % of sequence coverage |
|--------------|-------------------------------------------------------------------|---------------------------|---------------|-------------------------------------------------|------------------------|
| Glareosin    | Not available. Sequence in Loxley <i>et al.</i> (2017) supp. data | 16933                     | 1 to 9        | WVTVALAADNVNK-TQGTNNVLYVYGK                     | 9-17                   |
| MglaOBP1     | D3VW62_MYOGA                                                      | 16646                     | 1, 2, 4, 5, 9 | DLLATDTCPE-WVTTAIAADNVDK                        | 8-14                   |
| MglaOBP2     | D3VW63_MYOGA                                                      | 16840                     | 1 to 9        | GQPLTPEQYEK-GQPLTPEQYEKLEEFK-LIFVVGKGQPLTPEQYEK | 10-15                  |
| MglaOBP3     | D3VW64_MYOGA                                                      | 16752                     | 1 to 9        | EQNIPTENIR-GQPLTPEQYEK-GQPLTPEQYEKLEEFK         | 10-16                  |

|              |                                                                        |     |
|--------------|------------------------------------------------------------------------|-----|
| Glaerosin    | HSELDGK <b>WVTVALAADNVNK</b> LLEGGSLRLYLRELTCTEACNRLEVTFYLKANGQCTKTKV  | 60  |
| D3VW62_MYOGA | QAELEGK <b>WVTTAIAADNVDK</b> IERGGLRLYIRKITCTEACSKMEVTFYVNENNQCSQTKI   | 60  |
| D3VW63_MYOGA | QAELEGKWVTTAIAADNIDTIEEGPMRIYVRELTCEACSKMGVTFYVNANGQCSETKV             | 60  |
| D3VW64_MYOGA | YAELEGTWYTTAIAADNVDTIEEGPLRLYVRELTCSKGCNKLGVTFYVNANGQCSKTTV            | 60  |
| Glaerosin    | VGNRQEDGKYRAQFENGDNFTFGPVYATPEFTLFANHNVDR <b>TQGTNNVLYVYGK</b> HGPLTPE | 120 |
| D3VW62_MYOGA | TGYRQEDGNRYRAQFE-GDNVFKPVAATEDIIVFASENVDRAGRTTNLVLVAGKGQPLTPE          | 119 |
| D3VW63_MYOGA | IGYRQEDGKYRTQFE-GDNRFEVPVHATPENIVFTNKNVDRTGRITTK <b>LIFVVGKGQPLTPE</b> | 119 |
| D3VW64_MYOGA | TGYMQEDGKYRTQFE-GDDRFKPVHATPDNIVFISQNVDRAGRTTNLIFVVGK <b>GQPLTPE</b>   | 119 |
| Glaerosin    | QYEKLEEFKALWNLPRENLQDVRAS-ECPK                                         | 149 |
| D3VW62_MYOGA | QHEKLEAYAKEHNIPPENIR <b>DLLATDTCPE</b>                                 | 149 |
| D3VW63_MYOGA | <b>QYEKLEEFK</b> EQGIPTENIREVLPTDTCPE                                  | 149 |
| D3VW64_MYOGA | <b>QYEKLEEFK</b> EQNIPTENIRNVLATDTCPE                                  | 149 |



**Supplementary Figure S1. MS/MS spectrum of the WVTVALAADNVNK peptide.** *De novo* analysis allows identifying the tag sequence “T-ALAAD” in ion 700.88 m/z 2<sup>+</sup>-charged. Manual annotation confirms the presence of the tag and completes sequencing with clear identification of the y2 fragment, corresponding to the dipeptide KN and allowing to deduce the dipeptide VN – the fragments y9 and y10 identifying Valine as the missing amino acid into the tag T-ALAAD – and the fragments y11 and y12 allowing to identify the WV dipeptide according to the measured mass of the peptide (1399.76 Da).

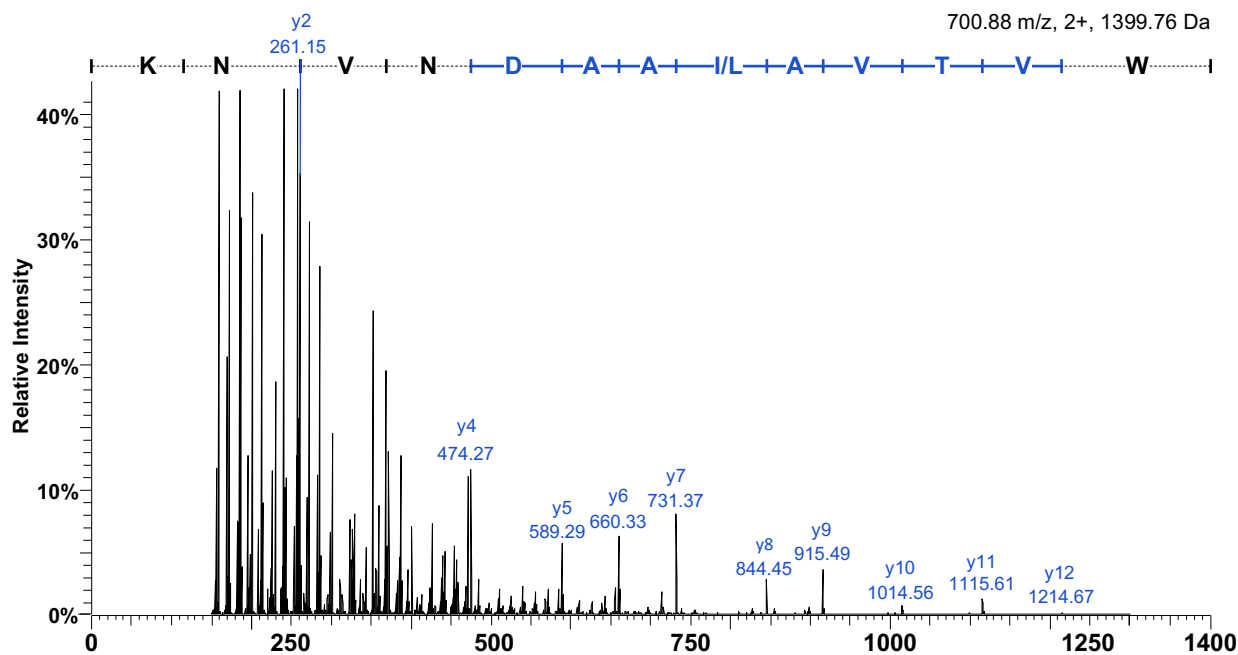

**Supplementary Figure S2. MS/MS spectrum of the GQPLTPEQYKLEEFK peptide.** Database searching allowed identifying the ion of  $m/z$  669.67 (3+) as matching with GQPLTPEQYKLEEFK peptide mass with a precursor mass error of 1.3 ppm and an ion score of 70.9. Upper red and blue sequences indicate the amino acids validated by detection of respectively N-terminal and C-terminal peptide fragments (b and y ions series).

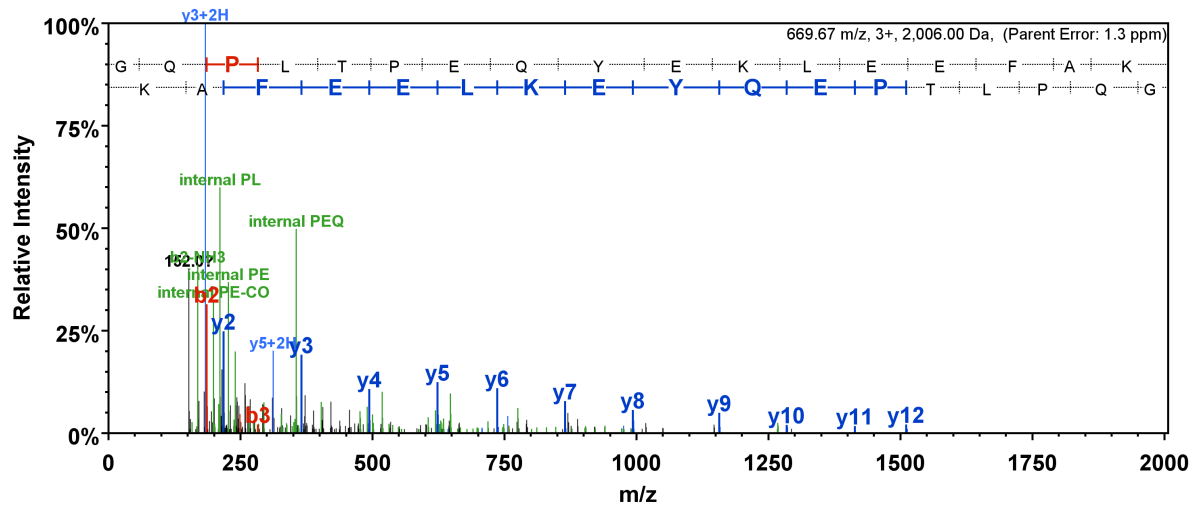

**Supplementary Table S5.** Primers used for amplification of the sequence encoding glareosin-like (arvicolin) from *A. terrestris* male liver

|                                             | 5' primer (forward)                                                              | 3' primer (reverse)                                                                          |
|---------------------------------------------|----------------------------------------------------------------------------------|----------------------------------------------------------------------------------------------|
| PCR with <i>de novo</i> MS information      | Peptide WVTVALAADNV at N-ter position<br>5'-TGGGTTACCGTTGCCCTTGCTGCTGACAATGTG-3' | Peptide PLTPEQYEKLEEF A at C-ter position<br>5'-CCTTTGACTCCTGAACAATATGAAAACTTGAGGAATTTGCC-3' |
| 5'RACE PCR                                  | GeneRacer™ 5' primer<br>5'-CGACTGGAGCACGAGGACACTGA-3'                            | Gene Specific 5' primer<br>5'-CCCGTCCTCTATCTTGTTTCACATTGTCAGCAGC-3'                          |
| 5'RACE nested PCR                           | GeneRacer™ 5' Nested Primer<br>5'-GGACACTGACATGGACTGAAGGAGTA-3'                  | Gene Specific 5' nested primer<br>5'-TCTATCACACGCCTCAGCACAAGTCAGTTCA-3'                      |
| 3'RACE PCR                                  | Gene Specific 3' primer<br>5'-GTTACCGTTGCCCTTGCTGCTGACAATGTGAAC-3'               | GeneRacer™ 3' primer<br>5'-GCTGTCAACGATACGCTACGTAACG-3'                                      |
| Full-length amplification from animal liver | 5ARVICOLIN<br>5'-ATGGTCAAGTTTCTGCTGCTGGCTT-3'                                    | 3ARVICOLIN<br>5'-TTATTTAGGACAAATATCTGTAGCCAGAACATC-3'                                        |

**Supplementary Table S6.** Sequences used for the building of the phylogenetic tree (Fig. 6)

| Accession                      | Description                                                                              | Name in the tree         |
|--------------------------------|------------------------------------------------------------------------------------------|--------------------------|
| Icl Query_9764                 | arvicolin                                                                                | arvicolin                |
| QEY02203                       | glareosin                                                                                | glareosin                |
| PO9465                         | aphrodisin[Cricetulus griseus]                                                           | Aphrodisin_C.griseus     |
| Q9Z1I7                         | Aphrodisin Mesocricetus auratus                                                          | Aphrodisin_M.auratus     |
| NP_620258.1                    | odorant-binding protein precursor [Rattus norvegicus]                                    | OBP_R.norvegicus         |
| <a href="#">AIA65156.1</a>     | odorant binding protein 1 [Mus musculus musculus]                                        | OBP1_M.musculus_musculus |
| <a href="#">AIA65157.1</a>     | odorant binding protein 2 [Mus musculus musculus]                                        | OBP2_M.musculus_musculus |
| <a href="#">AIA65158.1</a>     | odorant binding protein 5 [Mus musculus musculus]                                        | OBP5_M.musculus_musculus |
| <a href="#">AIA65159.1</a>     | odorant binding protein 6 [Mus musculus musculus]                                        | OBP6_M.musculus_musculus |
| <a href="#">AIA65155.1</a>     | odorant binding protein 7 [Mus musculus domesticus]                                      | OBP7_M.musculus          |
| XP_005346787.2                 | odorant-binding protein 2b [Microtus ochrogaster]                                        | OBP2b_M.ochrogaster      |
| <a href="#">ADC97771.1</a>     | odorant binding protein 2 [Myodes glareolus]                                             | OBP2_M.glareolus         |
| <a href="#">ADC97770.1</a>     | odorant binding protein 3 [Myodes glareolus]                                             | OBP1_M.glareolus         |
| <a href="#">ADC97772.1</a>     | odorant binding protein 3 [Myodes glareolus]                                             | OBP3_M.glareolus         |
| <a href="#">XP_028719045.1</a> | aphrodisin-like [Peromyscus leucopus]                                                    | Aphrodisin_P.leucopus    |
| <a href="#">XP_028717128.1</a> | odorant-binding protein 1a-like [Peromyscus leucopus]                                    | OBP1a_P.leucopus         |
| <a href="#">XP_028717126.1</a> | odorant-binding protein 1b-like [Peromyscus leucopus]                                    | OBP1b_P.leucopus         |
| <a href="#">AGT28425.1</a>     | odorant-binding protein [Phodopus sungorus]                                              | OBP_P.sungorus           |
| XP_027278553.1                 | odorant-binding protein 2a isoform X2 [Cricetulus griseus]                               | OBP2a_C.griseus          |
| EGW10044.1                     | Odorant-binding protein 2b [Cricetulus griseus]                                          | OBP2b_C.griseus          |
| XP_005406585.1                 | PREDICTED: male-specific submandibular salivary gland protein-like [Chinchilla lanigera] | SAL_C.lanigera           |
| XP_028639070.1                 | odorant-binding protein 2a-like [Grammomys surdaster]                                    | OBP2a_G.surdaster        |
| <a href="#">XP_021044251.1</a> | odorant-binding protein 1a-like [Mus pahari]                                             | OBP1a_M.pahari           |
| XP_021012716.1                 | odorant-binding protein 2a [Mus caroli]                                                  | OBP2a_M.caroli           |
| XP_012876753.1                 | odorant-binding protein 2b [Dipodomys ordii]                                             | OBP2b_D.ordii            |
| KFO21503.1                     | Odorant-binding protein 2b [Fukomys damarensis]                                          | OBP2b_F.damarensis       |
| <a href="#">XP_010604442.1</a> | PREDICTED: female-specific lacrimal gland protein [Fukomys damarensis]                   | LGP_F.damarensis         |
| <a href="#">XP_004867396.1</a> | female-specific lacrimal gland protein-like [Heterocephalus glaber]                      | LGP_H.glaber             |
| <a href="#">VEV85354.1</a>     | allergen lipocalin Cav p 1 isoform 2 precursor [Cavia porcellus]                         | Lipo_C.porcellus         |

## Supplementary Figure S3. Sequences used in Megablast search

### 1. *Microtus ochrogaster*

>ENSMOCT00000026459.1 Moch1  
EGKWDTIAVAADNVAKIEEGGPLRLYARELTCSEECNKLEVT  
YVNANGQCSETKITGYRQEDGTYRTQYEGDGRFKPVHGISDNIVFICQNVDRAGQTTNLI  
YVIGKGQPLTPEQYEKLEEFQONMPTENIRNVLATDTCPO

>ENSMOCT00000020380.1 Moch2  
YTELEGAWFTTAAIAADNVDTIEEGPMRLYVRELTCSACNEMD  
VTFYVNANGQCSETTVTGYRQEDGKYRTQFEGDNRFPVYATSENIVFTNKNVDRTGRTT  
NQIFVVGKGQPLTPEQYEKLEEFQONIPKENIRQVL

>ENSMOCT00000021279.1 Moch3  
ELEGKWVTTAAIAADNVDKIEEGPMRFYMRELTCCEECSSQME  
ITFYVNVDQCSQTKITAYRQEDGNYRTQFEGDHVFKPVFATEDIIVLAGDNVDRASRRRT  
KLIFVLEPLTPEQHEKLEAYVEERSIPPENIRDVLATDTFPK

>ENSMOCT00000011433.1 Moch4  
YAELGGKWLTTAAIAADNVDKIEKEGPLRLYVREITCSEACSSQMG  
VTFYVNANGQCSATKVIAYRQEDGKYRTQFEGDNRFPVHATPENIVFTSKNVDRAGQTT  
NLIFVVGKGKPLNPEQYEKLEEFQONIPKENIREVLAT

>XP\_005358711.1 aphrodisin-like [*Microtus ochrogaster*]  
HAEIEGKWVTTAAIAADNADIIIEGQPLRLYVRELACTEACNRLKFTFYTKVNGQ  
CTKTKVIANRQADDQYRARFEGDNIIVPVYVTPPEIIIFVVQNVNRTGRKTNLIYVLGKGQSLTSVQYEKLEEFK  
VQNIIPRKNIQDILATDICPK

### 2. Hamsters

>CAA46342.1 aphrodisin precursor protein [*Cricetus cricetus*]  
QDFAELQKQWYTIIVIAADNLEKIEEGGPLRFYFRHIDCYKNCSEMEITFYVITN  
NQCSKTTVIGYLGKNGTYQTQFEGNIFQPLYITSKIFFFTNKNMDRAGQETNMIVVAGKGNALTPENEILVQF  
AHEKKIPVENILNILATDTCPE

>CAA12414.1 aphrodisin [*Mesocricetus auratus*]  
QDFAELQKQWYTIIVIAADNLEKIEEGGPLRFYFRHIDCYKNCSEMEITFYVITN  
NQCSKTTVIGYLGKNGTYQTQFEGNIFQPLYITSKIFFFTNKNMDRAGQETNMIVVAGKGNALTPENEILVQF  
AHEKKIPVENILNILATDTCPE

### 3. *Myodes glareolus*

>Glaerosin  
HSELDGKWVT VALAADNVNK LEEGSLRLY LRELTCTEAC NRLEVTFYFK ANGQCTKTKV  
VGNRQEDGKY RAQFENDNT FGPVYATPEF TLFANHNVDRTQGTNNVLYV YGKHGPLTPE  
QYEKLEEFK LWNLPRENLO DVRASECPK

>ADC97770.1 odorant binding protein 1 [*Myodes glareolus*]  
QAELEGKWVTTAAIAADNVDKIERGGPLRLYIRKITCTEACSKMEVTFYVNENNQ  
CSQTKITGYRQEDGNYRAQFEGDNVFKPVAATEDIIVFASENVDRAGRRTNLVAVAGKGQPLTPEQHEKL  
EAYAKEHNIPPENIRDLLATDTCPE

>ADC97771.1 odorant binding protein 2 [*Myodes glareolus*]  
QAELEGKWVTTAAIAADNIDTIEEGPMRIYVRELTCSACSKMGVTFYVNANGQ  
CSETKVIGYRQEDGKYRTQFEGDNRFPVHATPENIVFTNKNVDRTGRTTKLIFVVGKGQPLTPEQYEKL  
EEFAKEQGIPTENIREVLPTDTCPE

>ADC97772.1 odorant binding protein 3 [*Myodes glareolus*]

YAELEGTWYTTAIAADNVDTIEEEGLRLYLRELTCSKGCNKLGVTFYVNANGO  
CSKTTVTGYMQEDGKYRTQFEGDDRFKPVHATPDNIVFISQNVDRAGRNTNLIFFVVGKGQPLTPEQYEKL  
EEFAKEQNIPTENIRNVLATDTCPE

#### 4. *Peromyscus maniculatus bairdii*

>ENSPEMP00000028399.1 pep

primary\_assembly:HU\_Pman\_2.1:X:97146138:97150695:1  
gene:ENSPEMG00000023943.2 transcript:ENSPEMT00000032820.2  
gene\_biotype:protein\_coding transcript\_biotype:protein\_coding  
description:aphrodisin-like [Source:NCBI gene;Acc:102925781]  
TMVKFLLLALAFGLAHAYAELQGWKTTAAAADNVEKIEKGGNLRRLYLREVTCHDCTEM  
YITFYVNLNGQCSKTTVTGYKQEDGTYKTQFEGDNVFPVYATSKNIVFTGKNTDRAGKE  
TKLIFVLGKGGSLNEEENEKLEEFTEKEGIPKENIRDVLATDTCPK

>ENSPEMP00000016619.2 pep

primary\_assembly:HU\_Pman\_2.1:X:97981442:97985253:1  
gene:ENSPEMG00000015794.2 transcript:ENSPEMT00000020931.2  
gene\_biotype:protein\_coding transcript\_biotype:protein\_coding  
MVKFLLLALALGVSCAHHNNPEITPSEVDGNWRTLYIGADNVEKVLKGGPLRAYFQHMEC  
SDECQTLTITFKVKVEGECQHTTVVGRKEKDGLYMTDYSGKNYFRVIEKADGIIIFHNVN  
VDNSGKETNVILVAGKEESLSKAQKQELKLANLNIPNENIQHLEPADTCHQ

>ENSPEMP00000032118.1 pep

primary\_assembly:HU\_Pman\_2.1:X:98056579:98060489:-1  
gene:ENSPEMG00000027218.1 transcript:ENSPEMT00000034930.1  
gene\_biotype:protein\_coding transcript\_biotype:protein\_coding  
TMVKFLLLALAFGLAHAAEVDGKWETVAIAADNVDKIEVERPLRLYLRELTCHNEECSEM  
GVTFYVKESVFFKYFHFTDEGDNKYELVYLTEEHAVFTSKNVDRAGTETNLIFVLGKGA  
LNEEHEKLVKFAEDKNIPTENIRNVLATGNINENFLAISYMCVCLMYINKYMYAYI

>ENSPEMP00000029229.1 pep

primary\_assembly:HU\_Pman\_2.1:X:98057327:98060486:-1  
gene:ENSPEMG00000027218.1 transcript:ENSPEMT00000037177.1  
gene\_biotype:protein\_coding transcript\_biotype:protein\_coding  
MVKFLLLALAFGLAHAVDVGKWETVAIAADNVDKIEVERPLRLYLRELTCHNEECSEMGVT  
FYVNRFLFMFLIFKYFHFTDEGDNKYELVYLTEEHAVFTSKNVDRAGTETNLIFVLGKNGS  
GLSENAVKVS LCKRGRFQIQPQIQYHGISEFLSTK

>ENSPEMP00000011691.1 pep

primary\_assembly:HU\_Pman\_2.1:X:98684305:98693100:1  
gene:ENSPEMG00000012253.2 transcript:ENSPEMT00000015881.2  
gene\_biotype:protein\_coding transcript\_biotype:protein\_coding  
gene\_symbol:Pbsn description:probasin [Source:MGI Symbol;Acc:MGI:1860484]  
TMRVFILLMLDLLGVSSVMMNKNLRKKIQGNWRTVYLASSTVEKISVDSPLRTRYFRRIE  
CGKRCRQIHFYFYIKKGARCOQYEVIGKKRQEFYQAQYEGKITVMIKMNVDKILLFHYFN  
KDVRGKVTRVAGVLARARKLTKDEMTQYMDLVEEIGIEDENVQRVLDTDTCP

>ENSPEMP00000011694.1 pep

primary\_assembly:HU\_Pman\_2.1:X:98684305:98693100:1  
gene:ENSPEMG00000012253.2 transcript:ENSPEMT00000015884.2  
gene\_biotype:protein\_coding transcript\_biotype:protein\_coding  
gene\_symbol:Pbsn description:probasin [Source:MGI Symbol;Acc:MGI:1860484]  
TMRVFILLMLDLLGVSSVMMNKNLRKKIQGNWRTVYLASSTVEKISVDSPLRTRYFRRIE  
CGKRCRQIHFYFYIKKGARCOQYEVIGKKRQEFYQAQSRARKLTKDEMTQYMDLVEEIGI  
EDENVQRVLDTDTCP

>ENSPEMP00000010512.1 pep

primary\_assembly:HU\_Pman\_2.1:4:14484302:14486186:-1  
gene:ENSPEMG00000011475.2 transcript:ENSPEMT00000014687.2  
gene\_biotype:protein\_coding transcript\_biotype:protein\_coding

gene\_symbol:Lcn9 description:lipocalin 9 [Source:MGI  
Symbol;Acc:MGI:1924954]  
MVLVLLVGLVPSLAAAQFNWEIISQKNYNMAKISGIWYSIFMASDNMTRIEENGDLRVFM  
RNINPLKNGSLKFDFFFVHGECAVAVTMVCEKTENYGEFTVAYEGENRVLLTETDYRMYI  
TFYMQNIKNGTKTHVLALYGRPLVLSSSYLERFVNICKKYRLNAQNIIDLTKNDVCF

>ENSPEMP00000019617.1 pep  
primary\_assembly:HU\_Pman\_2.1:4:14522300:14525589:-1  
gene:ENSPEMG00000017847.2 transcript:ENSPEMT00000023958.2  
gene\_biotype:protein\_coding transcript\_biotype:protein\_coding  
gene\_symbol:Lcn11 description:lipocalin 11 [Source:MGI  
Symbol;Acc:MGI:2684955]  
IPGRHSRGMKLLLLLVLGGLAWTLQDFSPEQVIGSWETLKLASNDRSVVEEEGAYECFM  
TGIALLDNGNLNVSFYFHRKDGKIVKVEFYVAEKDTPGRYTFEYHGNLYLTFVAVTEEFAI  
IDLENQRDGEPLIVVELHGRTQEEGKLGMAHYRRQTARRGILPSNIVDVFLKRPCATQE

>ENSPEMP00000011685.1 pep  
primary\_assembly:HU\_Pman\_2.1:4:14571108:14574294:-1  
gene:ENSPEMG00000012251.2 transcript:ENSPEMT00000015875.2  
gene\_biotype:protein\_coding transcript\_biotype:protein\_coding  
gene\_symbol:Obp2b description:odorant-binding protein 2b-like [Source:NCBI  
gene;Acc:102925381]  
MKNLLIFLLLGLVAVLKAQEVPSDDQEELSGTWHIKALVCDKNHTEREGPKKVFPMVTVA  
LEGGDLEVEITFWKKGQCHKKKIVMHKTDEPGKYTAFKGGKVIYIQELSVKDHYIFYCEG  
QHHGKSRRMGKLVGRNPEENPEALEEFKKFAQGGKGLRQENILVPEQSDQCTPESD

>ENSPEMP00000027785.1 pep  
primary\_assembly:HU\_Pman\_2.1:2:81215874:81218970:-1  
gene:ENSPEMG00000023493.2 transcript:ENSPEMT00000032202.2  
gene\_biotype:protein\_coding transcript\_biotype:protein\_coding  
MKLLLMLLLLALLELTLVVCVHAEGETSARGKNFNPKKIEGKWYSVGLASDKREMIIEEGSM  
RVFVEDIDVFENSSLAFKFHTKINGVCTGLYLVCDETEKDGEYFVEYDGRNKFTVLDTDY  
DGYVIFHLRNVNKGETFQLMELYGRKQDLSSKIKEKFAELCKKHGIVEENILDLTEADRC  
LQARDG

>ENSPEMP00000035169.1 pep  
primary\_assembly:HU\_Pman\_2.1:2:81264179:81265670:1  
gene:ENSPEMG00000031411.1 transcript:ENSPEMT00000041420.1  
gene\_biotype:protein\_coding transcript\_biotype:protein\_coding  
LVCDETEKDGEYFVEYDGRNKFTVLDTDYDGYVIFHLRNVNKGETFQLMELYGRKQDLSS  
KIKEKFAELCKKHGIVEENILDLTEADRCLQARDG

>ENSPEMP00000012546.2 pep  
primary\_assembly:HU\_Pman\_2.1:2:82263569:82269126:-1  
gene:ENSPEMG00000012837.2 transcript:ENSPEMT00000016754.2  
gene\_biotype:protein\_coding transcript\_biotype:protein\_coding  
gene\_symbol:Ambp description:alpha 1 microglobulin/bikunin precursor  
[Source:MGI Symbol;Acc:MGI:88002]  
MQNLKTQRPQSHAAPPEKAHPAETLPDIKQHNQNTSRQTGIYGKWFNLAIGSTCPWLK  
IKDKISMSTLVLQEGETEAEISVSSTRWRRGVCEEISWTYEKTDIDGKFLSYNPKWNATL  
ETYVVHTNYDEYAIFFITKKTFRDHGPTITAKLYGREPQLRDSLLLEFREVALLSVGIPENS  
IIFMVDRGKQCQSVDPHPWLWVIRRRPSTKCSKAQNTLFLRV

**Supplementary Figure S4.** Number of arvicolin reads counted in the liver transcriptome of *A. terrestris* males and females. Raw data coming from the sequencing by Illumina of the liver transcriptome of the six animals were deposited in the sequence Read Archive of NCBI under Bioproject #PRJNA545200.

| Sex    | Animal | reads by million of sequences |
|--------|--------|-------------------------------|
| Female | AT-F2  | 745,7882                      |
| Female | AT-F8  | 15,82129                      |
| Female | AT-F7  | 79,36758                      |
| Male   | AT-M1  | 101,3807                      |
| Male   | AT-M3  | 36710,23                      |
| Male   | AT-M4  | 44792,08                      |

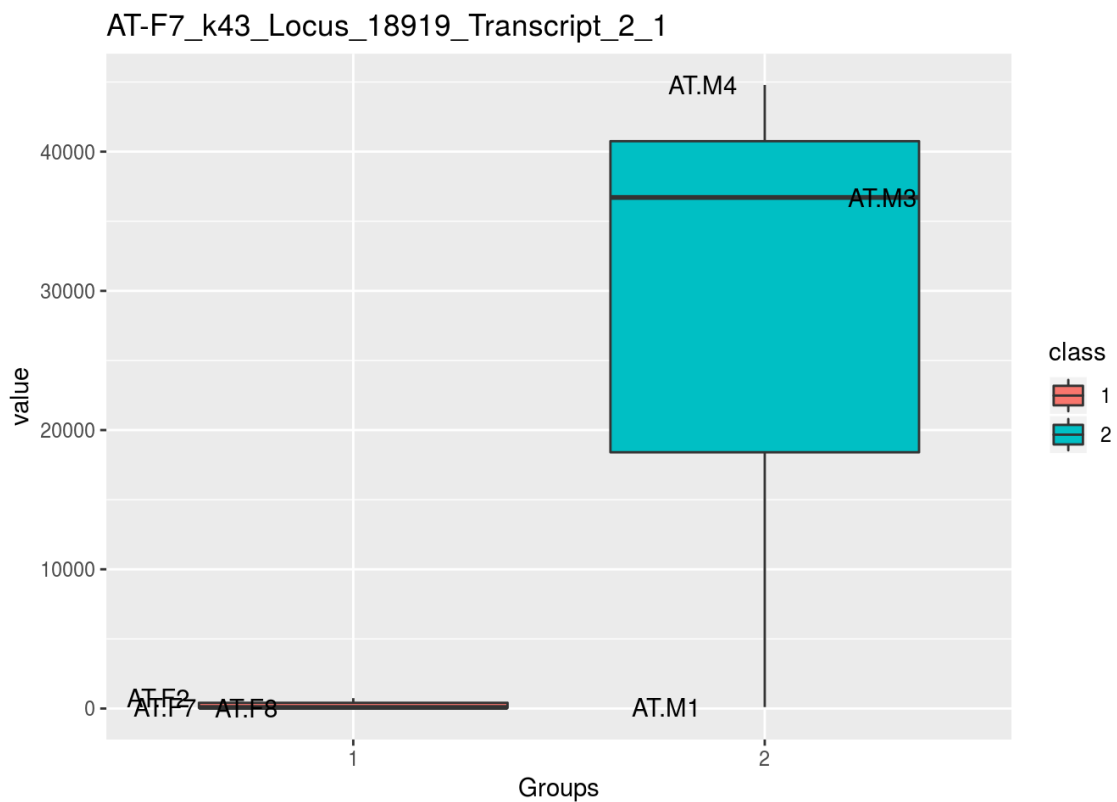



**Supplementary Figure S5.** Two-dimensional electrophoresis of male 6 (October) extract of urinary proteins. Spots 10-19 were cut out and analysed by nano-LC-MS/MS.

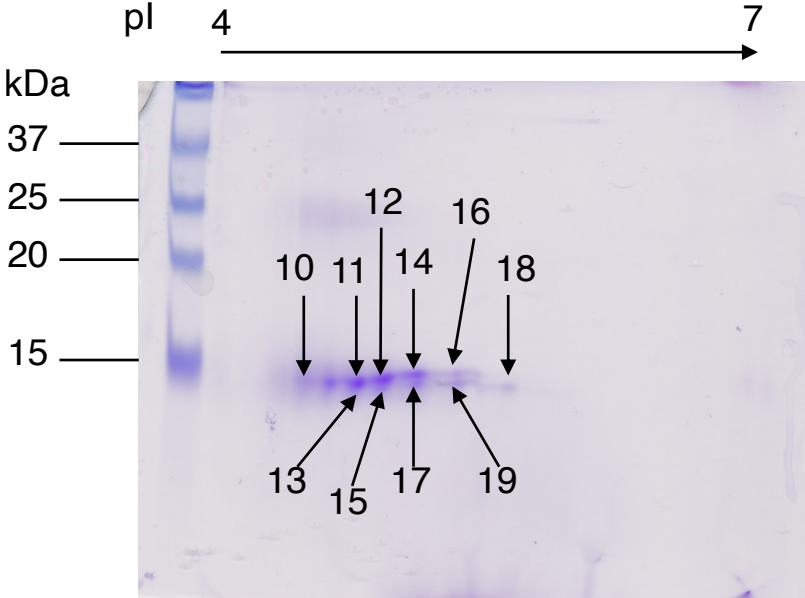

**Supplementary Figure S6.** MS/MS spectra of identified phosphopeptides from arvicolin. *m/z*, ion score, retention time and spectra of the naked peptides (A and C) and the corresponding phosphopeptides (B and D).

A: naked peptide (TSNMIYVYGKGQPLTPEQYEK)

| Previous AA | Sequence              | Next AA | PTM (AA position) | Score | Coverage | MH+ | <i>m/z</i> | ppm    | charge | Retention time |         |
|-------------|-----------------------|---------|-------------------|-------|----------|-----|------------|--------|--------|----------------|---------|
| R           | TSNMIYVYGKGQPLTPEQYEK | I       |                   | 55.48 | 119      | 139 | 2445.19    | 816.07 | 3.80   | 3              | 14.1667 |

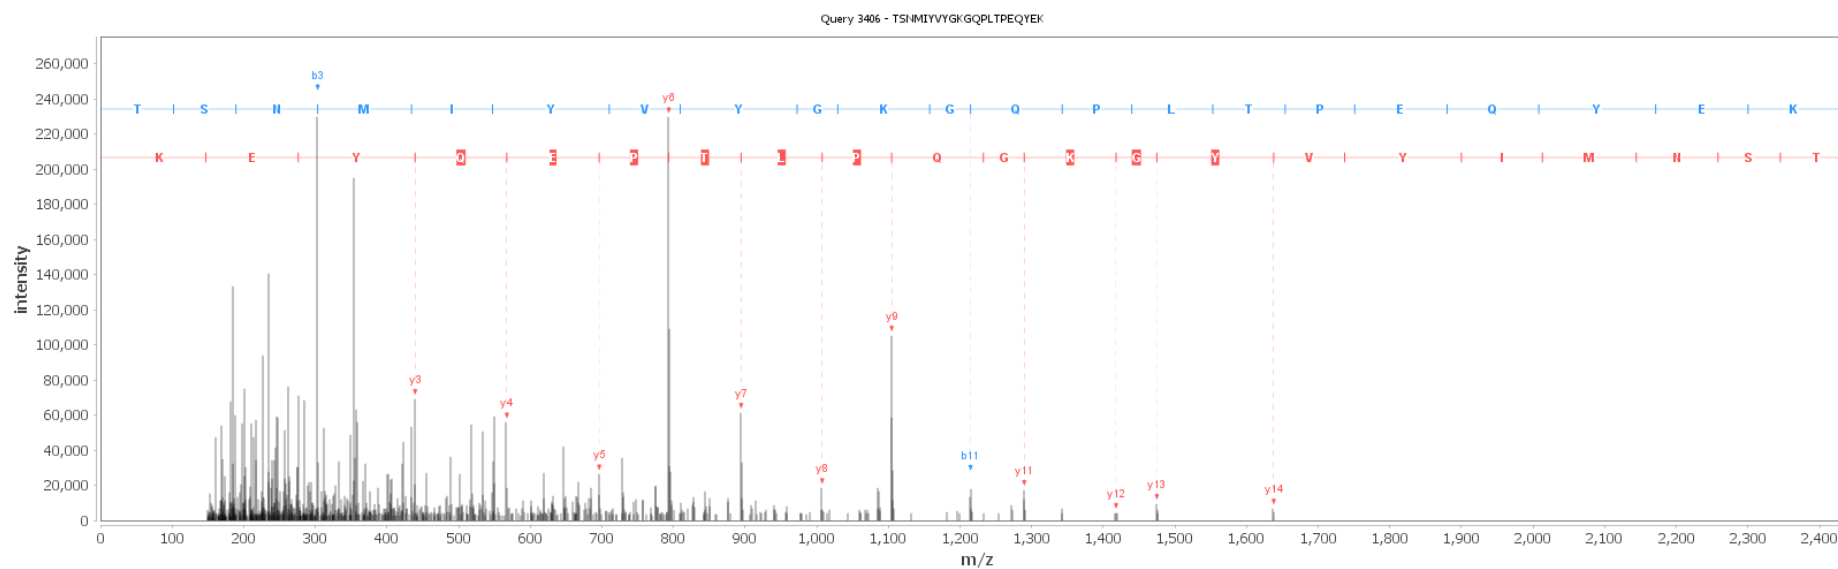

B: phosphorylated peptide (TSNMIYVYGKGQPLTPEQYEK)

| Previous AA | Sequence              | Next AA | PTM (AA position)          | Score | Coverage | MH+ | m/z     | ppm    | charge | Retention time |         |
|-------------|-----------------------|---------|----------------------------|-------|----------|-----|---------|--------|--------|----------------|---------|
| R           | TSNMIYVYGKGQPLTPEQYEK | I       | Phospho (S2); Phospho (Y8) | 21.33 | 119      | 139 | 2605.12 | 869.43 | 62.02  | 3              | 12.5167 |
| R           | TSNMIYVYGKGQPLTPEQYEK | I       | Phospho (T1); Phospho (Y6) | 21.33 | 119      | 139 | 2605.12 | 869.43 | 62.02  | 3              | 12.5167 |
| R           | TSNMIYVYGKGQPLTPEQYEK | I       | Phospho (T1); Phospho (Y8) | 21.33 | 119      | 139 | 2605.12 | 869.43 | 62.02  | 3              | 12.5167 |
| R           | TSNMIYVYGKGQPLTPEQYEK | I       | Phospho (S2); Phospho (Y6) | 21.33 | 119      | 139 | 2605.12 | 869.43 | 62.02  | 3              | 12.5167 |

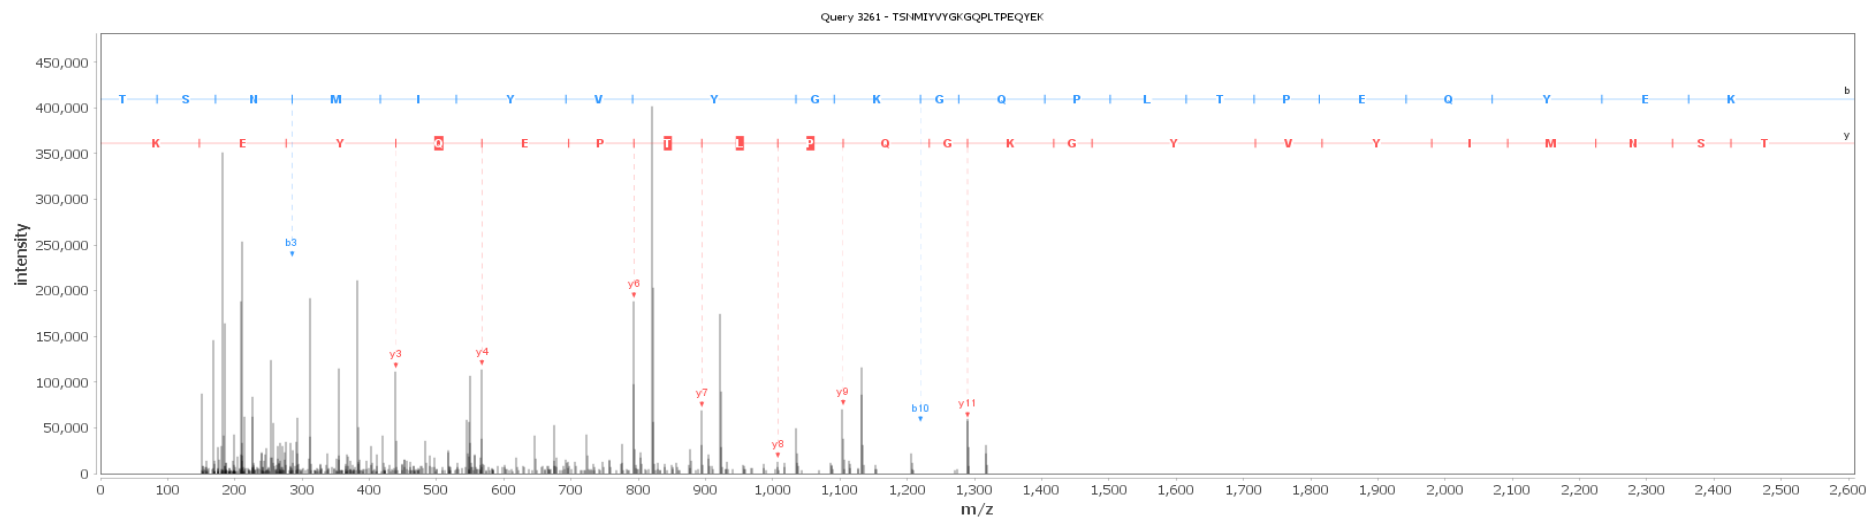

C: naked peptide (AQNIPTENIQDVLATDICPK)

| Previous AA | Sequence             | Next AA | PTM (AA position)     | Score  | Coverage | MH+ | m/z     | ppm     | charge | Retention time |         |
|-------------|----------------------|---------|-----------------------|--------|----------|-----|---------|---------|--------|----------------|---------|
| K           | AQNIPTENIQDVLATDICPK | -       | Carbamidomethyl (C18) | 110.87 | 146      | 165 | 2239.12 | 1120.56 | -2.55  | 2              | 17.9833 |

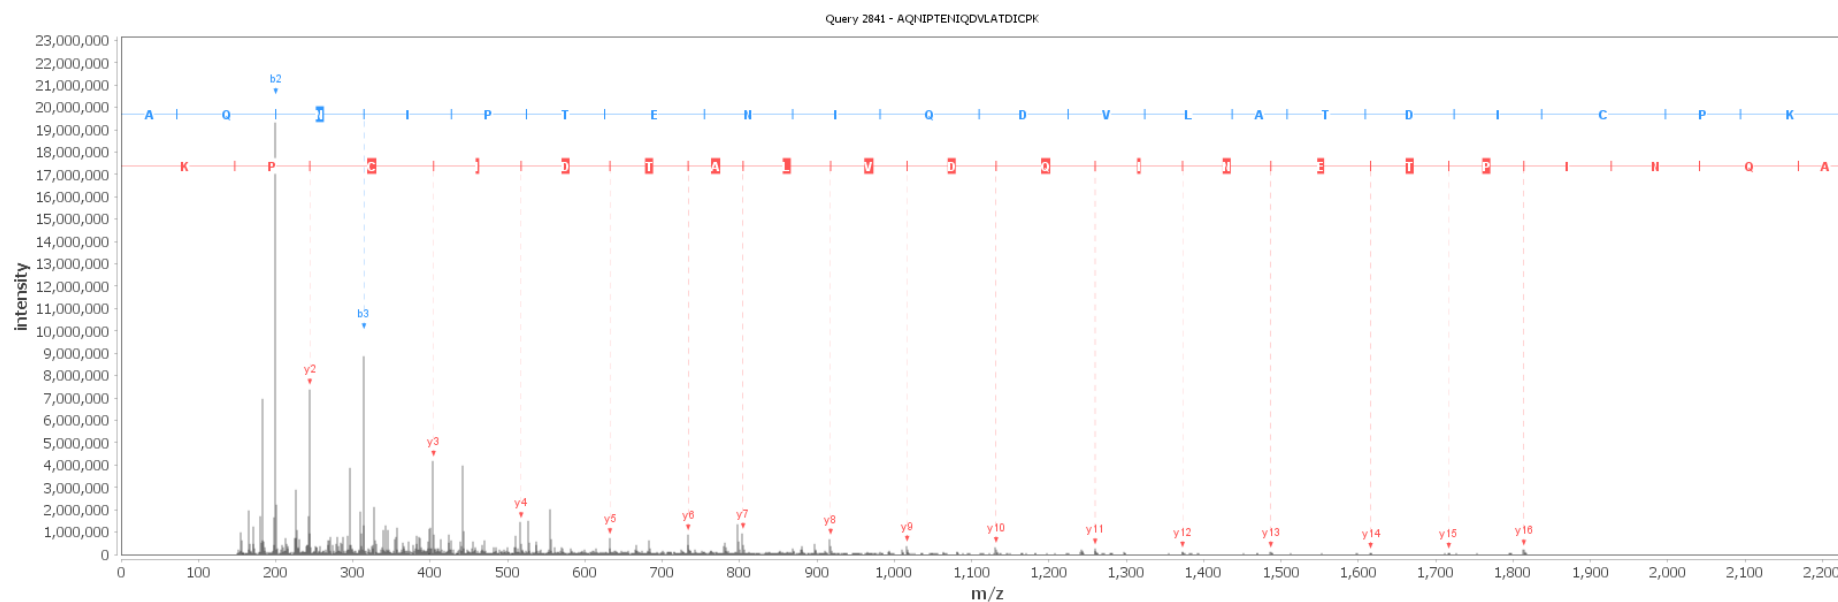

D: phosphorylated peptide (AQNIPTENIQDVLATDICPK)

| Previous AA | Sequence             | Next AA | PTM (AA position)                   | Score | Coverage | MH+ | m/z     | ppm     | charge | Retention time |         |
|-------------|----------------------|---------|-------------------------------------|-------|----------|-----|---------|---------|--------|----------------|---------|
| K           | AQNIPTENIQDVLATDICPK | -       | Phospho (T6); Carbamidomethyl (C18) | 15.85 | 146      | 165 | 2319.08 | 1160.57 | 22.88  | 2              | 16.0167 |

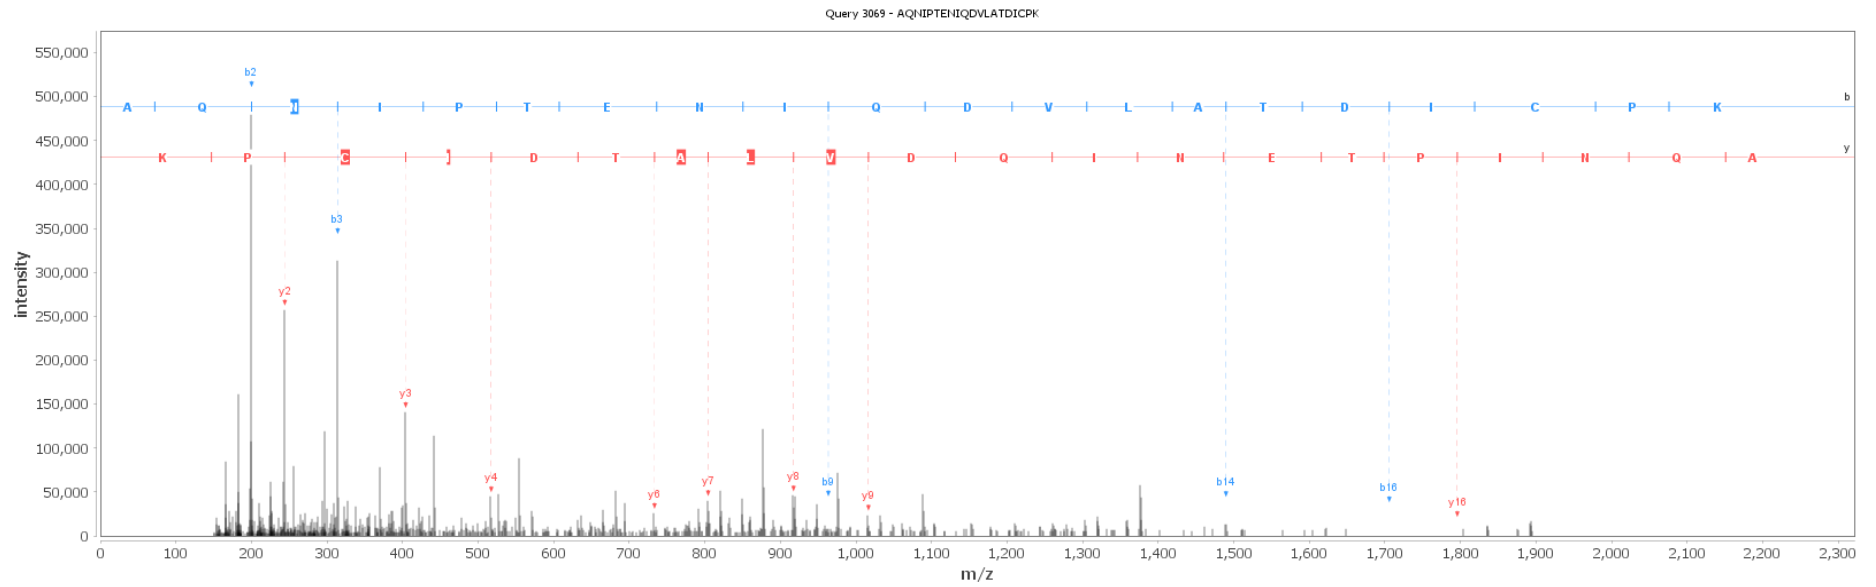

Supplement: 41598_2019_54935_MOESM1_ESM.pdf [file 41598_2019_54935_MOESM1_ESM.pdf]
